# Supplementary material
Source: PubMed Central journal article supplement (PMC2902287)
Supplement: ddn122_1.pdf [file ddn122_1.pdf]

Supplement **Table 1.** PCR and sequencing primers and Taqman assays for *ABCB1* SNPs

| #    | SNP                     |   | Sequence (5'→3')            | Applied Biosystems assay |
|------|-------------------------|---|-----------------------------|--------------------------|
| 1    | rs1045642               | F | GGCAAAGAAATAAAGCGACTG       | C_7586657_1_             |
|      |                         | R | CCAGAGAGGCTGCCACAT          |                          |
| 2    | rs6949448               | F | TCAGTGGCTCTCGAATGATG        | C_29276085_20            |
|      |                         | R | TGAGTCTGTGGATTTGAGCA        |                          |
| 3    | rs2235067               | F | GGGTCATATCCTACCTGGACA       | C_26907812_10            |
|      |                         | R | TTCCGAACCGTTGTTTCTTT        |                          |
| 4, 5 | rs2032583,<br>rs2032582 | F | TCTCATGAAGGTGAGTTTTTCAGA    |                          |
|      |                         | R | AAACACATTCTTAGAGCATAGTAAGCA |                          |
| 6    | rs1922242               | F | AAGTGTTTGTGGAAACATCATT      | C_1253821_10             |
|      |                         | R | TCCTCCAAAAGGAAACTGGA        |                          |
| 7    | rs1128503               | F | TTGAATGAAGAGTTTCTGATGTTTC   | C_7586662_10             |
|      |                         | R | TCAGCTGGACTGTTGTGCTC        |                          |
| 8    | rs2520464               | F | CTGGCCTGTCCTTATGGGTA        | C_15889343_10            |
|      |                         | R | GCAAAAAGAGCTACCCTGGTC       |                          |
| 9    | rs3789243               | F | TTGTGGTCAAAGACTGATACACG     | C_2982727_20             |
|      |                         | R | TTTGGCATTGATTGCTTCT         |                          |
